# Supplementary material for: Fast particulate nitrate formation via N 2 O 5 uptake aloft in winter in Beijing
Source: Copernicus journal article supplement (doi:10.5194/acp-18-10483-2018), 2018-07-23
Supplement: Supplementary file 1 [file acp-18-10483-2018-supplement.pdf]

Supplement of Atmos. Chem. Phys., 18, 10483–10495, 2018  
<https://doi.org/10.5194/acp-18-10483-2018-supplement>  
© Author(s) 2018. This work is distributed under  
the Creative Commons Attribution 4.0 License.

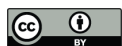

*Supplement of*

## **Fast particulate nitrate formation via $\text{N}_2\text{O}_5$ uptake aloft in winter in Beijing**

**Haichao Wang et al.**

*Correspondence to:* Keding Lu (k.lu@pku.edu.cn)

The copyright of individual parts of the supplement might differ from the CC BY 4.0 License.

1 **Lists of support information:**

2 **Figure S1.** The time series of PM<sub>2.5</sub> from December 16 to 22, 2016 observed by PKU  
3 and a number of national monitoring sites in Beijing.

4 **Figure S2.** Intercomparison of NO<sub>x</sub> and O<sub>3</sub> at PKU and IAP site.

5 **Figure S3.** The vertical profiles of NO<sub>x</sub> and O<sub>3</sub> in the noon on December 18, 2016 at  
6 IAP site.

7 **Table S1.** The instrumentation and parameter details at PKU site.

8

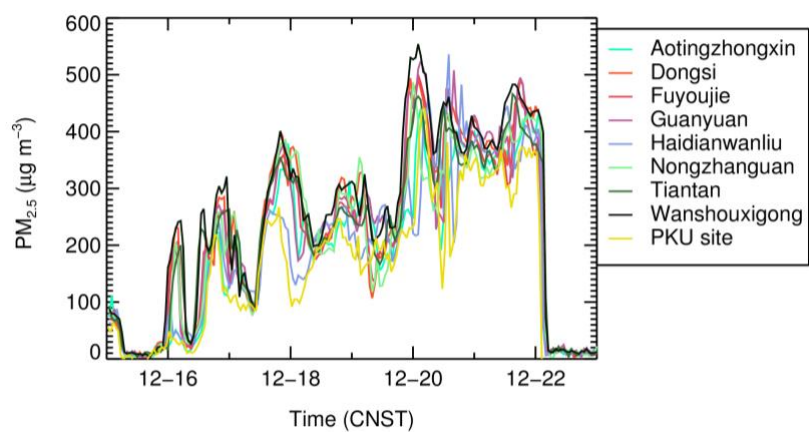

9

10 **Figure S1.** The similarity of the PM<sub>2.5</sub> concentrations at different sites throughout  
11 urban Beijing demonstrated that the observed PM pollution was a regional event.

12

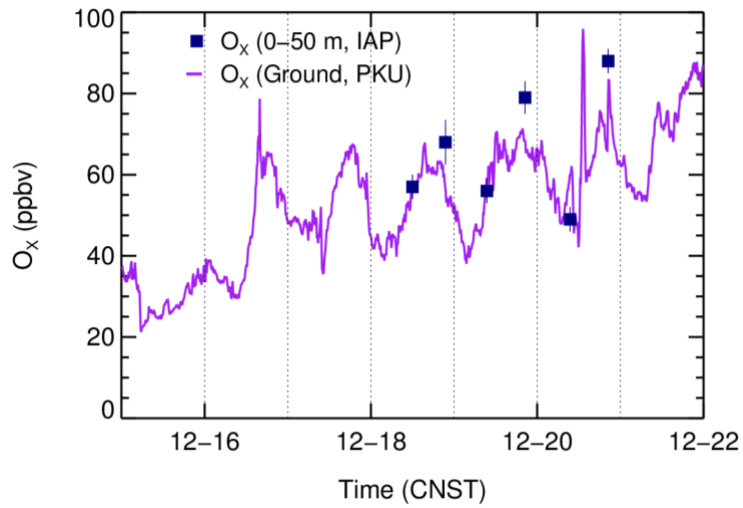

13

14 **Figure S2.** The intercomparison of the  $O_x$  concentrations at PKU (purple line) and IAP  
 15 site (navy square), the navy line shows the standard deviation at IAP site, the  
 16 consistency in the two sites demonstrated that the observed  $O_x$  pollution was also a  
 17 regional event.

18

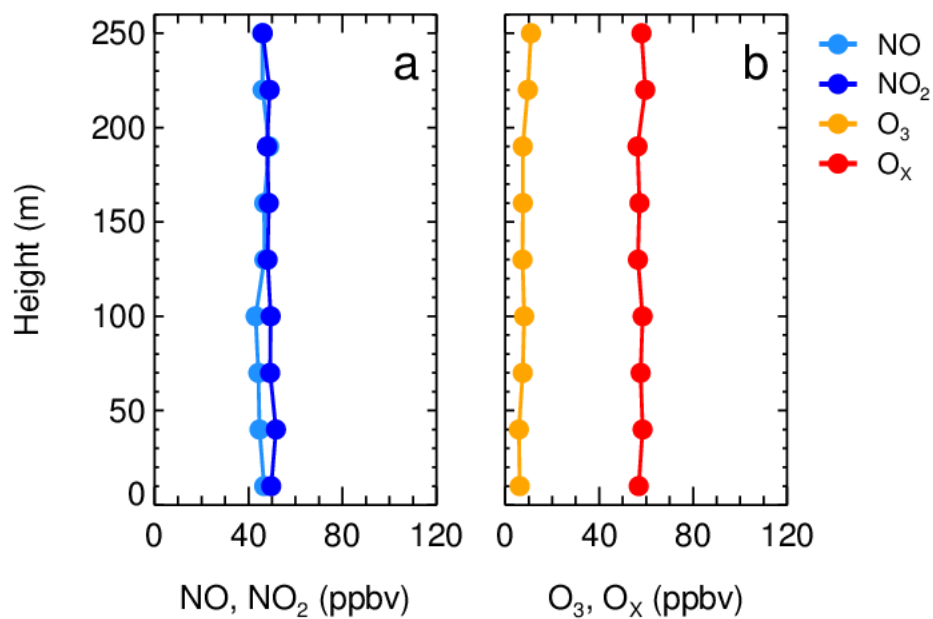

20

21 **Figure S3.** Vertical profiles of NO<sub>2</sub>, NO, O<sub>3</sub>, and O<sub>x</sub> at 11:31-12:00 in the morning of  
22 December 18, 2016. Suggesting the trace gases was well mixed in the noon.

23

24 **Table S1.** Measured parameters and the corresponding measurement instruments from  
25 PKU site.

| Species           | Detection of limit               | Method                    | Accuracy   |
|-------------------|----------------------------------|---------------------------|------------|
| NO                | 60 pptv ( $2\sigma$ , 1min)      | Chemiluminescence (CL)    | $\pm 20\%$ |
| NO <sub>2</sub>   | 0.3 ppbv ( $2\sigma$ , 1min)     | Photolytic converter + CL | $\pm 20\%$ |
| O <sub>3</sub>    | 0.5 ppbv ( $2\sigma$ , 1min)     | UV photometry             | $\pm 5\%$  |
| PM <sub>2.5</sub> | 0.1 $\mu\text{g m}^{-3}$ (1 min) | TEOM 1400A analyzer       | $\pm 5\%$  |
| PNSD              | 14 nm -697 nm (4 min)            | SMPS                      | $\pm 20\%$ |

26
